# Supplementary material for: Seed Priming with Triacontanol Alleviates Lead Stress in Phaseolus vulgaris L. (Common Bean) through Improving Nutritional Orchestration and Morpho-Physiological Characteristics
Source: MDPI journal article supplement (doi:10.3390/plants12081672), 2023-04-17
Supplement: s1 [file s1]

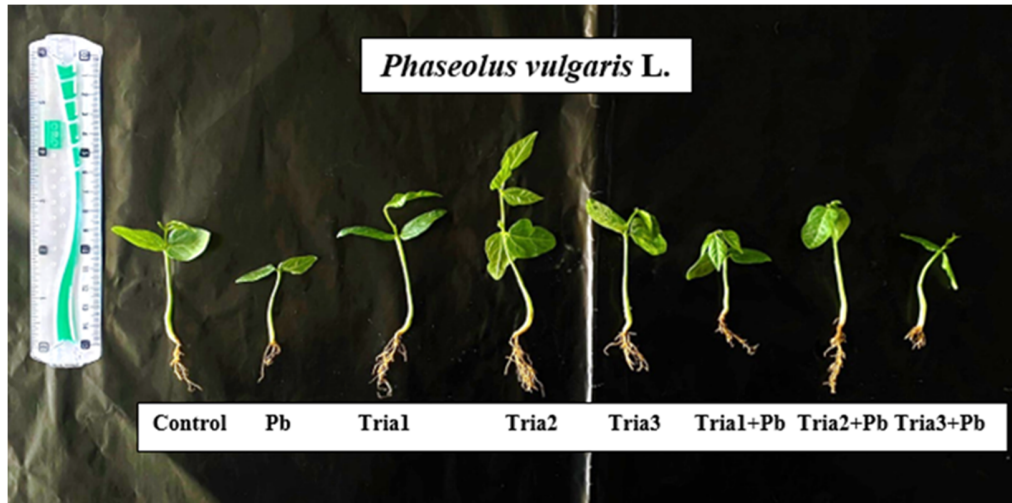

**Figure S1. Effect of Triaccontanol and Pb on Germination and Morpho-physiological Characteristics of *Phaseolus vulgaris* L. Seedlings.** Control=uncontaminated control, Pb = 400mg kg<sup>-1</sup> Pb, Tria-1 =10μM, Tria-2 =20 μM, Tria-3 =30μM of Tria.
